# Supplementary material for: Simulation training in vitreoretinal surgery: a systematic review
Source: PubMed Central journal article supplement (PMC6460826; doi:10.1186/s12886-019-1098-x), 2019-04-11
Supplement: 12886_2019_1098_MOESM1_ESM.pdf [file 12886_2019_1098_MOESM1_ESM.pdf]

## Search Strategies

Search strategy: PubMed (02-03-2018)

|                                         |                |
|-----------------------------------------|----------------|
| 01. Vitreoretinal surgery [MeSH Terms]  | 373 results    |
| 02. Simulation training [MeSH Terms]    | 5974 results   |
| 03. High fidelity training [MeSH Terms] | 119 results    |
| 04. Vitreoretinal surgery               | 3401 results   |
| 05. Retinal surgery                     | 41979 results  |
| 06. Simulation                          | 322803 results |
| 07. Simulator                           | 13983 results  |
| 08. Virtual reality                     | 7973 results   |
| 09. 4 OR 5                              | 42597 results  |
| 10. 6 OR 7 OR 8                         | 334648 results |
| 11. 10 AND 9                            | 150 results    |
| 12. Virtual reality [MeSH Terms]        | 160 results    |
| 13. 2 OR 3 OR 11                        | 6121 results   |
| 14. 12 AND 1                            | 1 results      |
| 15. 11 OR 14                            | 150 results    |

Final search: (Vitreoretinal surgery [MeSH Terms] AND (Simulation training [MeSH Terms] OR High fidelity training [MeSH Terms] OR Virtual reality [MeSH Terms])) OR ((Vitreoretinal surgery OR Retinal surgery) AND (Simulation OR Simulator OR Virtual reality))

Search strategy: EMBASE (Ovid) (02-03-2018)

|                               |                |
|-------------------------------|----------------|
| 01. Exp simulation training/  | 2129 results   |
| 02. Exp simulation/           | 237539 results |
| 03. Vitreoretinal surgery/    | 863 results    |
| 04. Retinal surger*.mp.       | 657 results    |
| 05. Vitreoretinal surger*.mp. | 2348 results   |
| 06. Simulation*.mp.           | 368090 results |
| 07. Simulator*.mp.            | 22316 results  |
| 08. Virtual reality/          | 12544 results  |
| 09. Virtual reality.mp.       | 16073 results  |
| 10. 1 OR 2 OR 8               | 249411 results |
| 11. 3 AND 10                  | 17 results     |
| 12. 4 OR 5                    | 2914 results   |
| 13. 6 OR 7 OR 9               | 389880 results |
| 14. 12 AND 13                 | 31 results     |
| 15. 11 OR 14                  | 31 results     |

Final search: ((Exp simulation training/ OR Exp simulation/ OR Virtual reality/) AND Vitreoretinal surgery/) OR ((Retinal surger\*.mp. OR Vitreoretinal surger\*.mp.) AND (Simulation\*.mp. OR Simulator\*.mp. OR Virtual reality.mp.))

Search strategy: Cochrane Library (02-03-2018)

|                                |               |
|--------------------------------|---------------|
| 01. [mh Vitreoretinal Surgery] | 28 results    |
| 02. [mh Simulation Training]   | 634 results   |
| 03. [mh Virtual Reality]       | 11 results    |
| 04. Retinal surgery            | 1676 results  |
| 05. Vitreoretinal surgery      | 265 results   |
| 06. Simulation                 | 8841 results  |
| 07. Simulator                  | 1699 results  |
| 08. Virtual reality            | 1591 results  |
| 09. 2 OR 3                     | 642 results   |
| 10. 1 AND 9                    | 0 results     |
| 11. 4 OR 5                     | 1789 results  |
| 12. 6 OR 7 OR 8                | 10625 results |
| 13. 11 AND 12                  | 22 results    |
| 14. 10 and 13                  | 22 results    |

Final search: ([mh "Vitreoretinal Surgery"] AND ([mh "Simulation Training"] OR [mh "Virtual Reality"])) OR ((Retinal surgery OR Vitreoretinal surgery) AND (Simulation OR Simulator OR Virtual reality))
