# Supplementary material for: Simulation training in vitreoretinal surgery: a systematic review
Source: PubMed Central journal article supplement (PMC6460826; doi:10.1186/s12886-019-1098-x), 2019-04-11
Supplement: 12886_2019_1098_MOESM2_ESM.pdf [file 12886_2019_1098_MOESM2_ESM.pdf]

## MERSQI Scores

Designated scores of individual MERSQI items.

| Individual MERSQI domains, items and requirements. | <i>Item score*</i> | Yeh et al. | Jonas et al. | Thomsen et al. | Grodin et al. | Vergmann et al. | Rossi et al. | Solverson et al. |
|----------------------------------------------------|--------------------|------------|--------------|----------------|---------------|-----------------|--------------|------------------|
| Study design <sup>a</sup>                          |                    |            |              |                |               |                 |              |                  |
| Singlegroup posttest only                          | 1                  | 1          |              |                |               |                 |              |                  |
| Singlegroup pre- and posttest                      | 1.5                |            |              |                | 1.5           |                 |              |                  |
| Nonrandomized, multiple groups                     | 2                  |            |              | 2              |               | 2               | 2            | 2                |
| Randomized controlled trial                        | 3                  |            | 3            |                |               |                 |              |                  |
| Sampling                                           |                    |            |              |                |               |                 |              |                  |
| Number of institutions studied                     |                    |            |              |                |               |                 |              |                  |
| 1                                                  | 0.5                | 0.5        | 0.5          | 0.5            |               | 0.5             | 0.5          | 0.5              |
| 2                                                  | 1                  |            |              |                |               |                 |              |                  |
| >2                                                 | 1.5                |            |              |                | 1.5           |                 |              |                  |
| Response rate, %                                   |                    |            |              |                |               |                 |              |                  |
| <50 or not reported                                | 0.5                |            |              |                |               |                 |              |                  |
| 50-74                                              | 1                  | 1          |              |                |               |                 |              |                  |
| >74                                                | 1.5                |            | 1.5          | 1.5            | 1.5           | 1.5             | 1.5          | 1.5              |
| Type of data                                       |                    |            |              |                |               |                 |              |                  |
| Assessment by participant                          | 1                  | 1          |              |                |               |                 |              |                  |
| Objective measurement                              | 3                  |            | 3            | 3              | 3             | 3               | 3            | 3                |
| Validity of evaluation instrument                  |                    |            |              |                |               |                 |              |                  |
| Internal structure                                 |                    |            |              |                |               |                 |              |                  |
| Not reported                                       | 0                  | 0          | 0            |                | 0             | 0               | 0            | 0                |
| Reported                                           | 1                  |            |              | 1              |               |                 |              |                  |
| Content                                            |                    |            |              |                |               |                 |              |                  |
| Not reported                                       | 0                  | 0          |              |                | 0             |                 | 0            | 0                |
| Reported                                           | 1                  |            | 1            | 1              |               | 1               |              |                  |
| Relationships to other variables                   |                    |            |              |                |               |                 |              |                  |
| Not reported                                       | 0                  |            | 0            |                | 0             |                 |              |                  |
| Reported                                           | 1                  | 1          |              | 1              |               | 1               | 1            | 1                |
| Data analysis                                      |                    |            |              |                |               |                 |              |                  |
| Appropriateness                                    |                    |            |              |                |               |                 |              |                  |
| Inappropriate for design or type of data           | 0                  |            |              |                |               |                 |              |                  |
| Appropriate for design or type of data             | 1                  | 1          | 1            | 1              | 1             | 1               | 1            | 1                |
| Complexity of analysis                             |                    |            |              |                |               |                 |              |                  |
| Descriptive only                                   | 1                  | 1          |              |                | 1             |                 |              |                  |
| Beyond descriptive                                 | 2                  |            | 2            | 2              |               | 2               | 2            | 2                |
| Outcomes                                           |                    |            |              |                |               |                 |              |                  |
| Satisfaction, attitudes, perceptions, opinions     | 1                  | 1          |              |                |               |                 |              |                  |
| Knowledge, skills                                  | 1.5                |            | 1.5          | 1.5            | 1.5           | 1.5             | 1.5          | 1.5              |
| Behaviors                                          | 2                  |            |              |                |               |                 |              |                  |
| Patient/health care outcome                        | 3                  |            |              |                |               |                 |              |                  |

The highest possible score was 18. The six MERSQI domains and total score are highlighted. MERSQI; Medical Education Research Study Quality Instrument; <sup>a</sup>, as categorized in context with desired outcomes; \*, the score that would be assigned to a study given it fulfilled the item requirements.
